# Supplementary material for: Anteroposterior Radiography Demonstrates Higher Diagnostic Sensitivity for Detecting Medial Compartment Joint Space Narrowing Compared to the Rosenberg View in Knees with Anteromedial Osteoarthritis
Source: Research Square preprint supplement (doi:10.21203/rs.3.rs-6485971/v1), 2025-06-17
Supplement: Supplementary file 1 [file a6eb622ffc9d54d8cbd85b6a.docx]

Analysis: A priori: Compute required sample size one-way ANOVA

Input: Effect size f = 0.25

α err prob = 0.05

Power (1-β err prob) = 0.95

Number of groups = 5

Output: Noncentrality parameter λ = 19.0625000

Critical F = 2.4017397

Numerator df = 4

Denominator df = 300

Total sample size = 305

Actual power = 0.9521313
